# Supplementary material
Source: ML conference proceedings conference paper supplement (https://openaccess.thecvf.com/content/ICCV2023/html/Yu_HAL3D_Hierarchical_Active_ICCV_2023_paper.html)
Supplement: Supplementary file 2 [file Yu_HAL3D_Hierarchical_Active_ICCV_2023_supplemental.zip]

Archive with 2 entries (2 files):
- 05418-supp/HAL3D_SUPP.pdf
- 05418-supp/HAL3D_video.mp4
